# Supplementary material for: 3D printed strontium–zinc-phosphate bioceramic scaffolds with multiple biological functions for bone tissue regeneration
Source: Royal Society of Chemistry journal article supplement (doi:10.1039/d2tb02614g), 2023-01-01
Supplement: d2tb02614g1.pdf [file d2tb02614g1.pdf]

## Supplementary information to

# 3D printed strontium-zinc-phosphate bioceramic scaffolds with multiple biological functions for bone tissue regeneration

Li Deng,<sup>ξa, b</sup> Lingwei Huang,<sup>ξb, c</sup> Hao Pan,<sup>ξc, e</sup> Qi Zhang,<sup>c, e</sup> Yumei Que,<sup>b, c</sup> Chen Fan,<sup>b, c</sup> Jiang Chang,<sup>\*b, c, f</sup> Siyu Ni,<sup>\*d</sup>  
Chen Yang<sup>\*a, b, c, d</sup>

Received 00th January 20xx,  
Accepted 00th January 20xx

DOI: 10.1039/x0xx00000x

---

<sup>a</sup> College of Chemistry and Chemical Engineering, Donghua University, Shanghai, 201620, China

<sup>b</sup> Zhejiang Engineering Research Center for Tissue Repair Materials, Wenzhou Institute, University of Chinese Academy of Sciences, Wenzhou, Zhejiang 325000, China

<sup>c</sup> Joint Centre of Translational Medicine, the First Affiliated Hospital of Wenzhou Medical University, Wenzhou, 325000, China

<sup>d</sup> Collage of Biological Science and Medical Engineering, Donghua University, Shanghai, 201620, China

<sup>e</sup> Department of Orthopaedics, The First Affiliated Hospital of Wenzhou Medical University, Wenzhou, 325000, China

<sup>f</sup> Shanghai Institute of Ceramics, Chinese Academy of Sciences, 1295 Dingxi Road, Shanghai, 200050, China

<sup>ξ</sup>These authors have contributed equally to this work and share the first authorship.

\*Correspondence: Jiang Chang: [jchang@mail.sic.ac.cn](mailto:jchang@mail.sic.ac.cn) Siyu Ni: [synicn@dhu.edu.cn](mailto:synicn@dhu.edu.cn)  
Chen Yang: [cryangchen@ucas.ac.cn](mailto:cryangchen@ucas.ac.cn)

<sup>†</sup>Electronic Supplementary Information (ESI) available: DOI: 10.1039/x0xx00000x

## 3D printed strontium-zinc-phosphate bioceramic scaffolds with multiple biological functions for bone tissue regeneration

**Table S1** Primer sequences for tested genes of HUVECs, MC3T3-E1 and RAW264.7 cells.

| Target gene    | Direction | Primer sequence (5'-3')   |
|----------------|-----------|---------------------------|
| GAPDH (mouse)  | Forward   | CAGGAGAGTGTTTCCTCGTCC     |
|                | Reverse   | TTTGCCGTGAGTGGAGTCAT      |
| ALP            | Forward   | GGAGATGGTATGGGCGTCTC      |
|                | Reverse   | GGACCTGAGCGTTGGTGTTA      |
| RUNX-2         | Forward   | GACTGTGGTTACCGTCATGGC     |
|                | Reverse   | ACTTGGTTTTTCATAACAGCGGA   |
| OCN            | Forward   | GAACAGACAAGTCCCACACAGC    |
|                | Reverse   | TCAGCAGAGTGAGCAGAAAGAT    |
| BMP-2          | Forward   | TCACTTATAGCCGATTATCTTCTTC |
|                | Reverse   | TTGGTTTATCCATGAGGCTAACTG  |
| IL-1 $\beta$   | Forward   | AATGCCACCTTTTGACAGTGATG   |
|                | Reverse   | TGATGTGCTGCTGCGAGATT      |
| TNF- $\alpha$  | Forward   | TAGCCACGTCGTAGCAAAC       |
|                | Reverse   | GCAGCCTTGCCCTTGAAGA       |
| iNOS           | Forward   | ACCCCTTGTGCTGTTCTCAG      |
|                | Reverse   | GGGATTCTGGAACATTCTGTGC    |
| TGF-1 $\beta$  | Forward   | TGATACGCCTGAGTGGCTGTCT    |
|                | Reverse   | CACAAGAGCAGTGAGCGCTGAA    |
| IL-1 $\alpha$  | Forward   | AGAGCCCTTATAGTCAGGAA      |
|                | Reverse   | TACACCCTGCAAAAGTTGTTC     |
| CD206          | Forward   | ATCCACGAGCAAATGTACCTCA    |
|                | Reverse   | TAGCCAGTTCAGATACCGGAA     |
| GAPDH (Human)  | Forward   | GATTTGGTCGTATTGGGCG       |
|                | Reverse   | CTGGAAGATGGTGATGG         |
| bFGF           | Forward   | CAATTCCCATGTGCTGTGAC      |
|                | Reverse   | ACCTTGACCTCTCAGCCTCA      |
| VEGF           | Forward   | TATGCGGATCAAACCTCACCA     |
|                | Reverse   | CACAGGGATTTTTCTGTCTTGCT   |
| HIF-1 $\alpha$ | Forward   | ATCCATGTGACCATGAGGAAAT    |
|                | Reverse   | CTCGGCTAGTTAGGGTACTT      |
| eNOS           | Forward   | GATGTTACCATGGCAACCAAC     |
|                | Reverse   | GAAAATGTCTTCGTGGTAGCG     |

## 3D printed strontium-zinc-phosphate bioceramic scaffolds with multiple biological functions for bone tissue regeneration

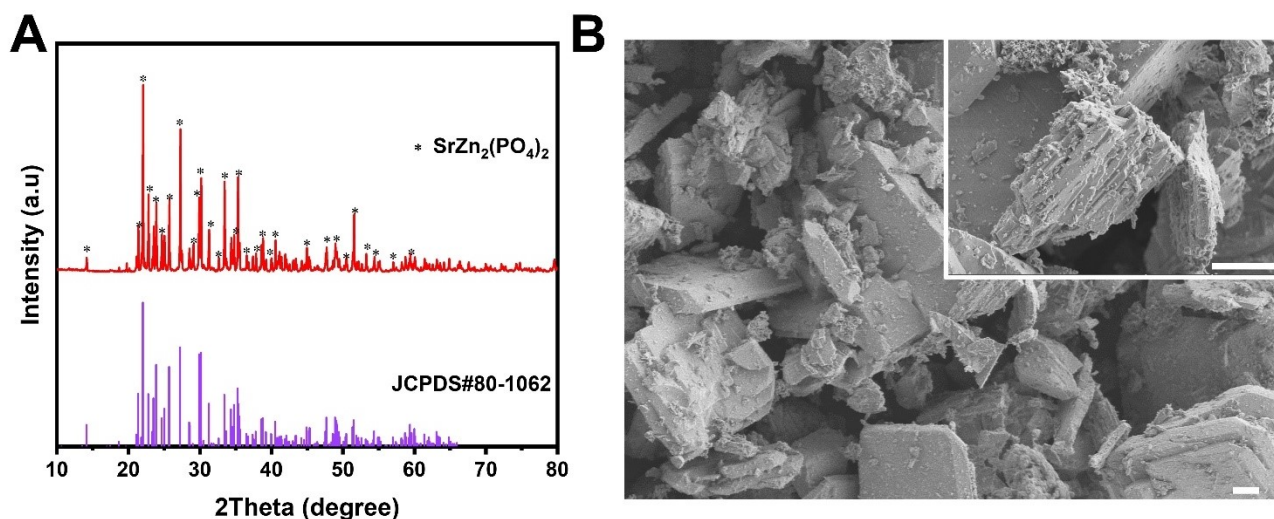

Fig. S1 Characterization of SZP powders. (A) XRD analysis of the crystalline. (B) SEM characterization of the morphology. Scale bar: 5  $\mu\text{m}$ .

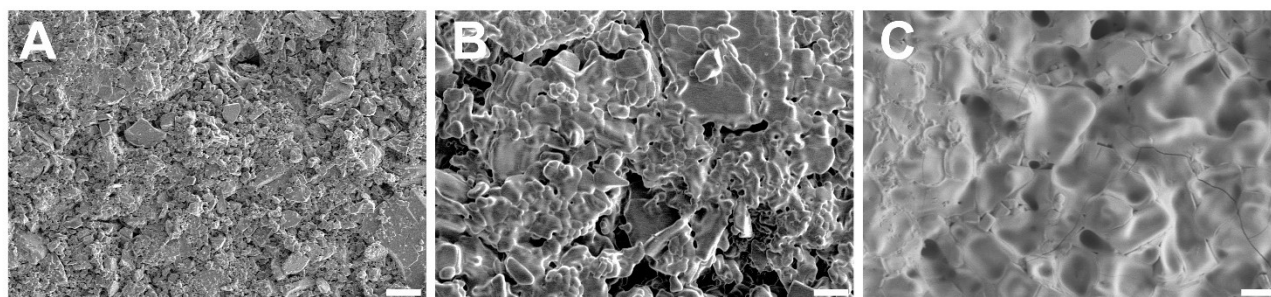

Fig. S2 SEM characterization of SZP scaffolds sintered at (A) 800  $^{\circ}\text{C}$ , (b) 900  $^{\circ}\text{C}$  and (c) 1000  $^{\circ}\text{C}$ . Scale bar: 10  $\mu\text{m}$ .

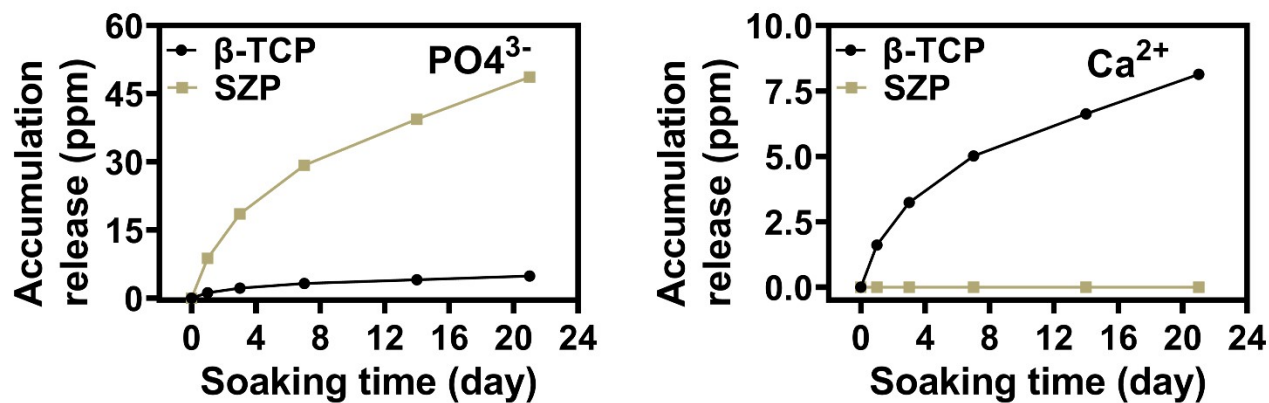

Fig. S3 Ion release profiles of  $\text{PO}_4^{3-}$  and  $\text{Ca}^{2+}$  during soaking in Tris-HCl solution (pH = 7.4) shock at 37  $^{\circ}\text{C}$  for 1, 3, 7, 14 and 21 days (n = 3).

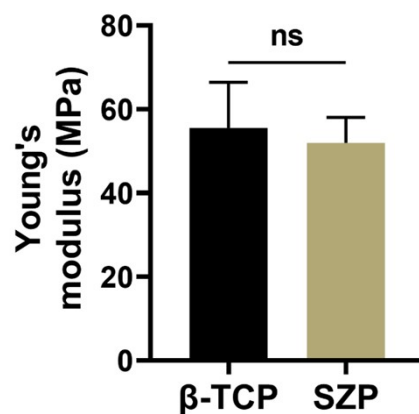

Fig. S4 Young's modulus of scaffolds from compressive testing ( $n = 3$ ). ns: no significant difference.

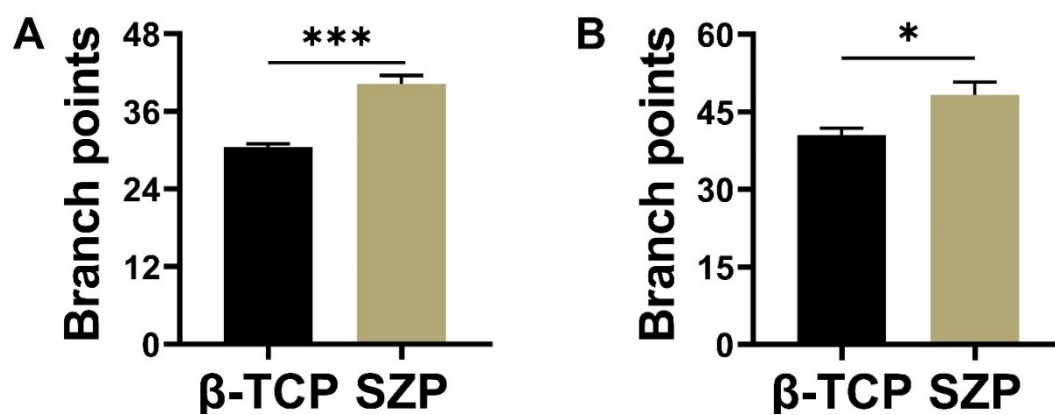

Fig. S5 Branch points of the in vitro tube formation after 4 h of culture (A) on scaffolds ( $n = 4$ ), and (B) in macrophage/scaffold conditioned medium ( $n = 4$ ). \* $P < 0.05$ , \*\*\* $P < 0.001$ .

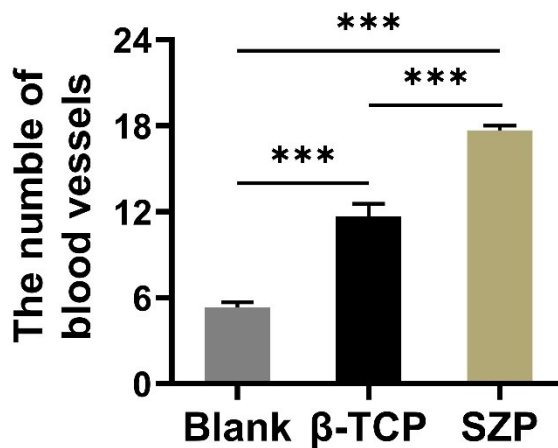

Fig. S6 The quantitative and histochemical analysis of neoangiogenesis in cranial bone defects ( $n = 3$ ). \*\*\* $P < 0.001$ .
